# Supplementary material for: Allelic expression analysis of the osteoarthritis susceptibility gene COL11A1 in human joint tissues
Source: PubMed Central journal article supplement (PMC3599795; doi:10.1186/1471-2474-14-85), 2013-03-08
Supplement: 1471-2474-14-85-S1.pdf [file 1471-2474-14-85-S1.pdf]

**Additional file 1: Table S1** Table of patient characteristics and their genotype at the three *COL11A1* SNPs studied in this report. F, female; M, male, K, knee, H, hip.

| Patient | Sex | Age at surgery (years) | Joint replaced at surgery | Genotype  |           |           |
|---------|-----|------------------------|---------------------------|-----------|-----------|-----------|
|         |     |                        |                           | rs2615977 | rs1676486 | rs9659030 |
| 1       | F   | 75                     | H                         | TT        | CT        | AG        |
| 2       | F   | 67                     | K                         | TT        | CC        | AA        |
| 3       | M   | 69                     | K                         | TT        | CT        | AG        |
| 4       | F   | 77                     | H                         | TG        | CC        | AG        |
| 5       | F   | 73                     | K                         | TT        | CC        | AA        |
| 6       | M   | 71                     | K                         | TT        | CT        | AG        |
| 7       | F   | 73                     | K                         | GG        | CC        | AA        |
| 8       | F   | 51                     | H                         | TT        | CT        | AG        |
| 9       | F   | 60                     | K                         | GG        | CC        | AG        |
| 10      | F   | 67                     | K                         | TT        | CT        | AG        |
| 11      | M   | 62                     | K                         | TT        | CT        | AG        |
| 12      | M   | 50                     | K                         | TG        | CC        | AA        |
| 13      | M   | 67                     | K                         | TT        | CT        | AG        |
| 14      | F   | 76                     | H                         | TT        | CC        | AA        |
| 15      | F   | 71                     | K                         | TG        | CC        | AG        |
| 16      | F   | 67                     | H                         | TT        | CC        | AA        |
| 17      | F   | 70                     | H                         | TT        | CC        | AA        |
| 18      | F   | 60                     | H                         | TG        | CC        | AA        |
| 19      | M   | 80                     | K                         | TG        | CC        | AG        |
| 20      | F   | 81                     | K                         | TG        | CC        | AG        |
| 21      | M   | 76                     | K                         | TG        | CT        | AA        |
| 22      | F   | 55                     | K                         | TT        | CT        | AA        |
| 23      | M   | 57                     | K                         | TT        | CT        | AA        |
| 24      | M   | 57                     | H                         | TT        | CT        | AG        |
| 25      | M   | 69                     | K                         | TG        | CT        | GG        |
| 26      | F   | 67                     | K                         | TT        | CC        | AA        |
| 27      | F   | 69                     | K                         | GG        | CC        | AA        |
| 28      | M   | 57                     | K                         | GG        | CC        | AG        |
| 29      | F   | 60                     | K                         | TG        | CC        | AA        |
| 30      | F   | 66                     | K                         | TT        | CC        | AA        |
| 31      | M   | 63                     | K                         | TT        | CT        | AG        |
| 32      | M   | 77                     | K                         | TT        | CC        | AA        |
| 33      | M   | 82                     | K                         | TT        | CT        | AA        |
| 34      | F   | 78                     | K                         | TT        | CC        | AA        |
| 35      | M   | 82                     | K                         | TG        | CT        | AG        |
| 36      | M   | 46                     | K                         | TT        | CC        | AA        |
| 37      | M   | 56                     | K                         | TT        | CT        | AG        |
| 38      | F   | 54                     | K                         | TT        | TT        | GG        |
| 39      | M   | 71                     | K                         | TT        | CT        | AG        |
| 40      | F   | 58                     | H                         | TT        | CC        | AA        |
| 41      | F   | 69                     | H                         | TG        | CT        | GG        |
| 42      | F   | 64                     | K                         | TT        | CT        | AA        |

|    |   |    |   |    |    |    |
|----|---|----|---|----|----|----|
| 43 | M | 63 | K | TG | CC | AA |
| 44 | F | 71 | H | TG | CC | AG |
| 45 | M | 70 | K | TG | CT | AG |
| 46 | M | 67 | K | TT | CT | AG |
| 47 | M | 86 | K | TT | CT | AA |
| 48 | F | 67 | K | TT | CC | AA |
| 49 | M | 71 | K | TG | CC | AA |
| 50 | F | 46 | K | TT | CC | AA |
| 51 | F | 62 | K | TT | CC | AA |
| 52 | F | 58 | K | TG | CC | AA |
| 53 | M | 69 | K | TG | CC | AG |
| 54 | M | 59 | K | TT | CT | AG |
| 55 | M | 64 | K | TT | CT | GG |
| 56 | F | 81 | K | GG | CC | AG |
| 57 | F | 80 | K | TT | CT | AG |
| 58 | F | 64 | K | TG | CC | AA |
| 59 | F | 78 | K | TG | CC | AG |
| 60 | F | 61 | K | TT | CT | AG |
| 61 | F | 80 | K | TG | CT | GG |
| 62 | F | 80 | K | TT | CC | AA |
| 63 | F | 59 | K | TG | CT | AG |
| 64 | F | 71 | H | TT | CT | AG |
| 65 | M | 74 | K | GG | CC | AG |
| 66 | F | 74 | H | TT | CC | AG |
| 67 | M | 72 | K | TG | CC | AG |
| 68 | M | 72 | K | TT | CC | AA |
| 69 | M | 68 | H | TG | CC | AA |
| 70 | F | 72 | H | TG | CC | AA |
| 71 | M | 68 | K | TG | CC | AA |
| 72 | M | 75 | K | TG | CC | AG |
| 73 | F | 82 | H | TG | CC | AG |
| 74 | F | 78 | K | TG | CC | AG |
| 75 | M | 72 | K | TG | CC | AG |
| 76 | F | 59 | K | TG | CC | AG |
| 77 | F | 71 | H | TG | CC | AG |
| 78 | M | 69 | K | TG | CC | AG |
