# Supplementary material for: Allelic expression analysis of the osteoarthritis susceptibility gene COL11A1 in human joint tissues
Source: PubMed Central journal article supplement (PMC3599795; doi:10.1186/1471-2474-14-85), 2013-03-08
Supplement: 1471-2474-14-85-S2.pdf [file 1471-2474-14-85-S2.pdf]

**Additional file 2: Table S2.** Summary table of the osteoarthritis (OA) patients studied

| Number | % Female | Mean age at surgery (age range), years |            | Strata (number) |             |          |           |
|--------|----------|----------------------------------------|------------|-----------------|-------------|----------|-----------|
|        |          | Female                                 | Male       | Female-hip      | Female-knee | Male-hip | Male-knee |
| 78     | 56       | 68 (46-82)                             | 68 (46-86) | 15              | 29          | 2        | 32        |
