# Supplementary material for: Allelic expression analysis of the osteoarthritis susceptibility gene COL11A1 in human joint tissues
Source: PubMed Central journal article supplement (PMC3599795; doi:10.1186/1471-2474-14-85), 2013-03-08
Supplement: 1471-2474-14-85-S4.pdf [file 1471-2474-14-85-S4.pdf]

**Additional file 4: Table S4.** Table of the PrimeTime Mini qPCR Assays for quantitative PCR analysis of *COL11A1*

| Gene           | Primer 1 (5'-3')           | Primer 2 (5'-3')              | Probe                                        |
|----------------|----------------------------|-------------------------------|----------------------------------------------|
| <i>COL11A1</i> | TTCTCCACGCTGATTGCTAC       | TTGGTGTTGAGGTTGGGAG           | 56-FAM/TTAACATCGCTGACGGGAAGTGGC/36-TAMSp     |
| <i>HPRT1</i>   | TGCTGAGGATTTGGAAAGGG       | ACAGAGGGCTACAATGTGATG         | 56-FAM/AGGACTGAACGTCTTGCTCGAGATG/36-TAMSp    |
| <i>GAPDH</i>   | GGCCATCCACAGTCTTCTG        | CAGCCTCAAGATCATCAGCAA         | 56-FAM/ATGACCACA/ZEN/GTCCATGCCATCACT/31ABkFQ |
| <i>18S</i>     | CGAATGGCTCATTAAATCAGTTATGG | TATTAGCTCTAGAATTACCACAGTTATCC | 56-FAM/TCCTTTGGTCGCTCGCTCCTCTCCC/TAMRA       |
