# Supplementary material for: Allelic expression analysis of the osteoarthritis susceptibility gene COL11A1 in human joint tissues
Source: PubMed Central journal article supplement (PMC3599795; doi:10.1186/1471-2474-14-85), 2013-03-08
Supplement: 1471-2474-14-85-S5.pdf [file 1471-2474-14-85-S5.pdf]

**Additional file 5: Table S5.** Table of the allelic ratios for the patients analysed for AEI at rs9659030 and rs1676486. Allelic ratios are shown  $\pm$  the standard error of the mean. P-values were calculated using a Mann Whitney U test. P-values  $< 0.05$  are highlighted in bold.

| rs9659030 |                                   |                 | rs1676486 |                                   |                 |
|-----------|-----------------------------------|-----------------|-----------|-----------------------------------|-----------------|
| Patient   | Allelic ratio (A/G)               | P value         | Patient   | Allelic ratio (C/T)               | P value         |
| 1         | 1.16 $\pm$ 0.16                   | 0.42            | <b>1</b>  | <b>0.36 <math>\pm</math> 0.01</b> | <b>&lt;0.01</b> |
| 3         | 0.98 $\pm$ 0.2                    | 1.00            | <b>3</b>  | <b>0.31 <math>\pm</math> 0.01</b> | <b>&lt;0.01</b> |
| 4         | 1.08 $\pm$ 0.08                   | 0.84            | <b>6</b>  | <b>0.43 <math>\pm</math> 0.08</b> | <b>&lt;0.01</b> |
| 8         | 1.09 $\pm$ 0.11                   | 0.55            | <b>8</b>  | <b>0.35 <math>\pm</math> 0.02</b> | <b>&lt;0.01</b> |
| 9         | 0.94 $\pm$ 0.1                    | 1.00            | <b>10</b> | <b>0.24 <math>\pm</math> 0.02</b> | <b>&lt;0.01</b> |
| 10        | 0.8 $\pm$ 0.06                    | 0.1             | <b>11</b> | <b>0.38 <math>\pm</math> 0.02</b> | <b>&lt;0.01</b> |
| <b>11</b> | <b>0.66 <math>\pm</math> 0.03</b> | <b>&lt;0.01</b> | <b>13</b> | <b>0.29 <math>\pm</math> 0.01</b> | <b>&lt;0.01</b> |
| 13        | 0.81 $\pm$ 0.07                   | 0.06            | <b>21</b> | <b>0.42 <math>\pm</math> 0.01</b> | <b>&lt;0.01</b> |
| 15        | 0.94 $\pm$ 0.12                   | 0.69            | <b>22</b> | <b>0.48 <math>\pm</math> 0.02</b> | <b>&lt;0.01</b> |
| 19        | 1.16 $\pm$ 0.05                   | 0.06            | <b>23</b> | <b>0.64 <math>\pm</math> 0.02</b> | <b>&lt;0.01</b> |
| <b>20</b> | <b>0.81 <math>\pm</math> 0.02</b> | <b>&lt;0.01</b> | <b>24</b> | <b>0.33 <math>\pm</math> 0.02</b> | <b>&lt;0.01</b> |
| 24        | 0.83 $\pm$ 0.08                   | 0.22            | <b>25</b> | <b>0.29 <math>\pm</math> 0.01</b> | <b>&lt;0.01</b> |
| 28        | 0.92 $\pm$ 0.05                   | 0.55            | <b>31</b> | <b>0.33 <math>\pm</math> 0.01</b> | <b>&lt;0.01</b> |
| 31        | 0.75 $\pm$ 0.05                   | 0.15            | <b>33</b> | <b>0.48 <math>\pm</math> 0.04</b> | <b>&lt;0.01</b> |
| 35        | 1.35 $\pm$ 0.6                    | 0.33            | <b>35</b> | <b>0.24 <math>\pm</math> 0.03</b> | <b>&lt;0.01</b> |
| <b>37</b> | <b>0.69 <math>\pm</math> 0.03</b> | <b>&lt;0.01</b> | <b>37</b> | <b>0.29 <math>\pm</math> 0.01</b> | <b>&lt;0.01</b> |
| <b>39</b> | <b>0.66 <math>\pm</math> 0.04</b> | <b>&lt;0.01</b> | <b>39</b> | <b>0.22 <math>\pm</math> 0.01</b> | <b>&lt;0.01</b> |
| 45        | 1.2 $\pm$ 0.16                    | 0.69            | <b>41</b> | <b>0.22 <math>\pm</math> 0.01</b> | <b>&lt;0.01</b> |
| 46        | 1.06 $\pm$ 0.1                    | 0.69            | <b>42</b> | <b>0.44 <math>\pm</math> 0.03</b> | <b>&lt;0.01</b> |
| 72        | 1.06 $\pm$ 0.12                   | 0.73            | <b>45</b> | <b>0.34 <math>\pm</math> 0.03</b> | <b>&lt;0.01</b> |
| 73        | 0.96 $\pm$ 0.18                   | 0.57            | <b>46</b> | <b>0.35 <math>\pm</math> 0.02</b> | <b>&lt;0.01</b> |
| 74        | 0.90 $\pm$ 0.04                   | 1.00            | <b>47</b> | <b>0.47 <math>\pm</math> 0.02</b> | <b>&lt;0.01</b> |
| 75        | 0.98 $\pm$ 0.04                   | 1.00            |           |                                   |                 |
| 76        | 0.99 $\pm$ 0.21                   | 0.79            |           |                                   |                 |
| 77        | 0.93 $\pm$ 0.14                   | 0.69            |           |                                   |                 |
| 78        | 0.72 $\pm$ 0.08                   | 0.55            |           |                                   |                 |
