# Supplementary material for: Allelic expression analysis of the osteoarthritis susceptibility gene COL11A1 in human joint tissues
Source: PubMed Central journal article supplement (PMC3599795; doi:10.1186/1471-2474-14-85), 2013-03-08
Supplement: 1471-2474-14-85-S7.pdf [file 1471-2474-14-85-S7.pdf]

**Additional file 7: Table S6.** Association analysis of rs1676486 with OA using the arcOGEN data

| Stratum    | Number of cases | Number of controls | T-allele frequency |          | P-value | Odds ratio<br>(95% confidence intervals) |
|------------|-----------------|--------------------|--------------------|----------|---------|------------------------------------------|
|            |                 |                    | Cases              | Controls |         |                                          |
| All cases  | 7410            | 11009              | 0.201              | 0.1905   | 0.012   | 1.069 (1.015-1.127)                      |
| Hip cases  | 3912            | 11009              | 0.201              | 0.1905   | 0.043   | 1.069 (1.002-1.141)                      |
| Knee cases | 4144            | 11009              | 0.2035             | 0.1905   | 0.010   | 1.086 (1.02-1.157)                       |
